# Supplementary material
Source: PubMed Central journal article supplement (PMC10752859)
Supplement: JI_2200691_Supplemental_1.pdf [file JI_2200691_Supplemental_1.pdf]

**Supplemental Table. Sequences of primers used for detection of target cDNA.**

| <u>Target</u>   | <u>Forward Primer Sequence</u> | <u>Reverse Primer Sequence</u> |
|-----------------|--------------------------------|--------------------------------|
| CD107a          | 5' -CTATCCAGGCCTACCTGTCG       | 5' -GGATACAGTGGGGTTTGTGG       |
| FasL            | 5' -ACTCCGTGAGTTCACCAACC       | 5' -TTAAATGGGCCACACTCCTC       |
| Granzyme B      | 5' -CTGACCTTGTCTCTGGCCTC       | 5' -CTCTCGAATAAGGAAGCCCC       |
| IL-2            | 5' -TCCTGAGCAGGATGGAGAAT       | 5' -GTCAAATCCAGAACATGCCG       |
| IL-4            | 5' -TCTCGAATGTACCAGGAGCC       | 5' -GGTGTTCCTTCGTTGCTGTGA      |
| IFN $\gamma$    | 5' -AGGCCATCAGCAACAACATA       | 5' -TGAGCTCATTGAATGCTTGG       |
| Perforin        | 5' -AAGGTAGCCAATTTTGCAGC       | 5' -CTGAGCGCCTTTTTGAAGTC       |
| TGF $\beta$     | 5' -GGAGAGCCCTGGATACCAAC       | 5' -AAGTTGGCATGGTAGCCCTT       |
| TNF $\alpha$    | 5' -GGTCTGGGCCATAGAACTGA       | 5' -CAGCCTCTTCTCATTCTGC        |
| GAPDH           | 5' -TTGATGGCAACAATCTCCAC       | 5' -CGTCCCCTAGACAAAATGGT       |
| $\beta$ -globin | 5' -GAAGCGATTCTAGGGAGCAG       | 5' -GGAGCAGCGATTCTGAGTAGA      |

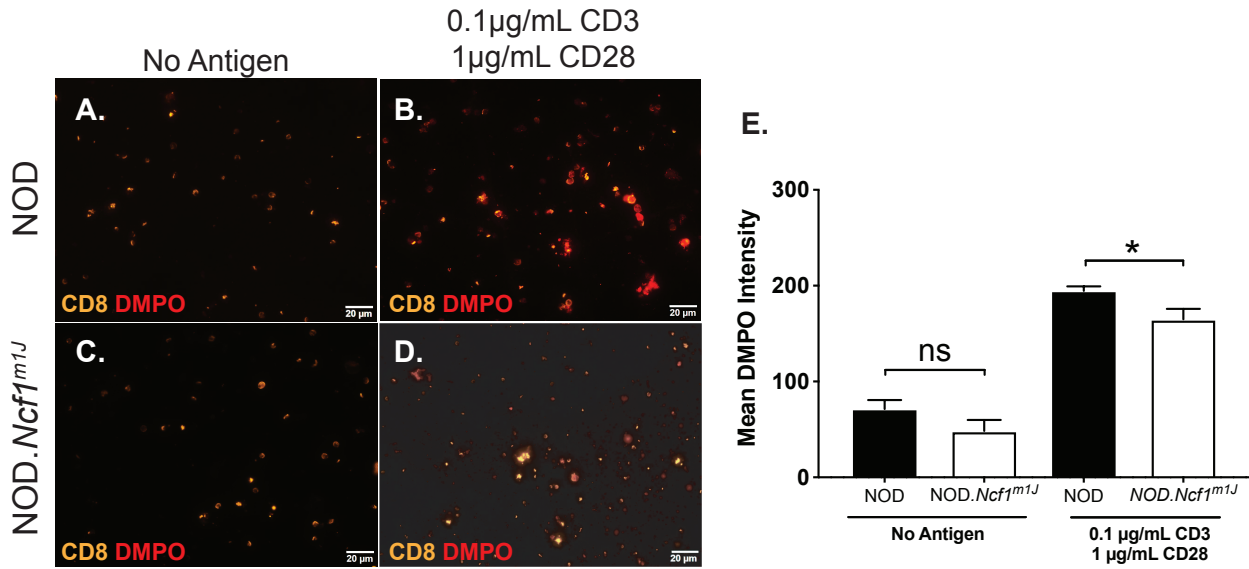

**Supplemental Figure 1. NOD.Ncf1<sup>m1J</sup> CD8<sup>+</sup> T cells exhibit restrained ROS production after polyclonal stimulation.** CD8<sup>+</sup> T cells from NOD or NOD.Ncf1<sup>m1J</sup> mice were stimulated with  $\alpha$ -CD3 (0.1  $\mu$ g/mL) and  $\alpha$ -CD28 (1  $\mu$ g/mL) in the presence of the spin trap DMPO. DMPO adducts were observed from (A) unstimulated NOD CD8<sup>+</sup> T cells, (B) stimulated NOD CD8<sup>+</sup> T cells, (C) unstimulated NOD.Ncf1<sup>m1J</sup> CD8<sup>+</sup> T cells, or (D) stimulated NOD.Ncf1<sup>m1J</sup> CD8<sup>+</sup> T cells using an Olympus IX81 Inverted Microscope with a 60x objective. Images were analyzed using ImageJ and give a pseudo-color: yellow for  $\alpha$ CD8 and red for DMPO. Statistical comparisons were made amongst the means of the unactivated or stimulated T cells after 24 hours (\* P < 0.05).

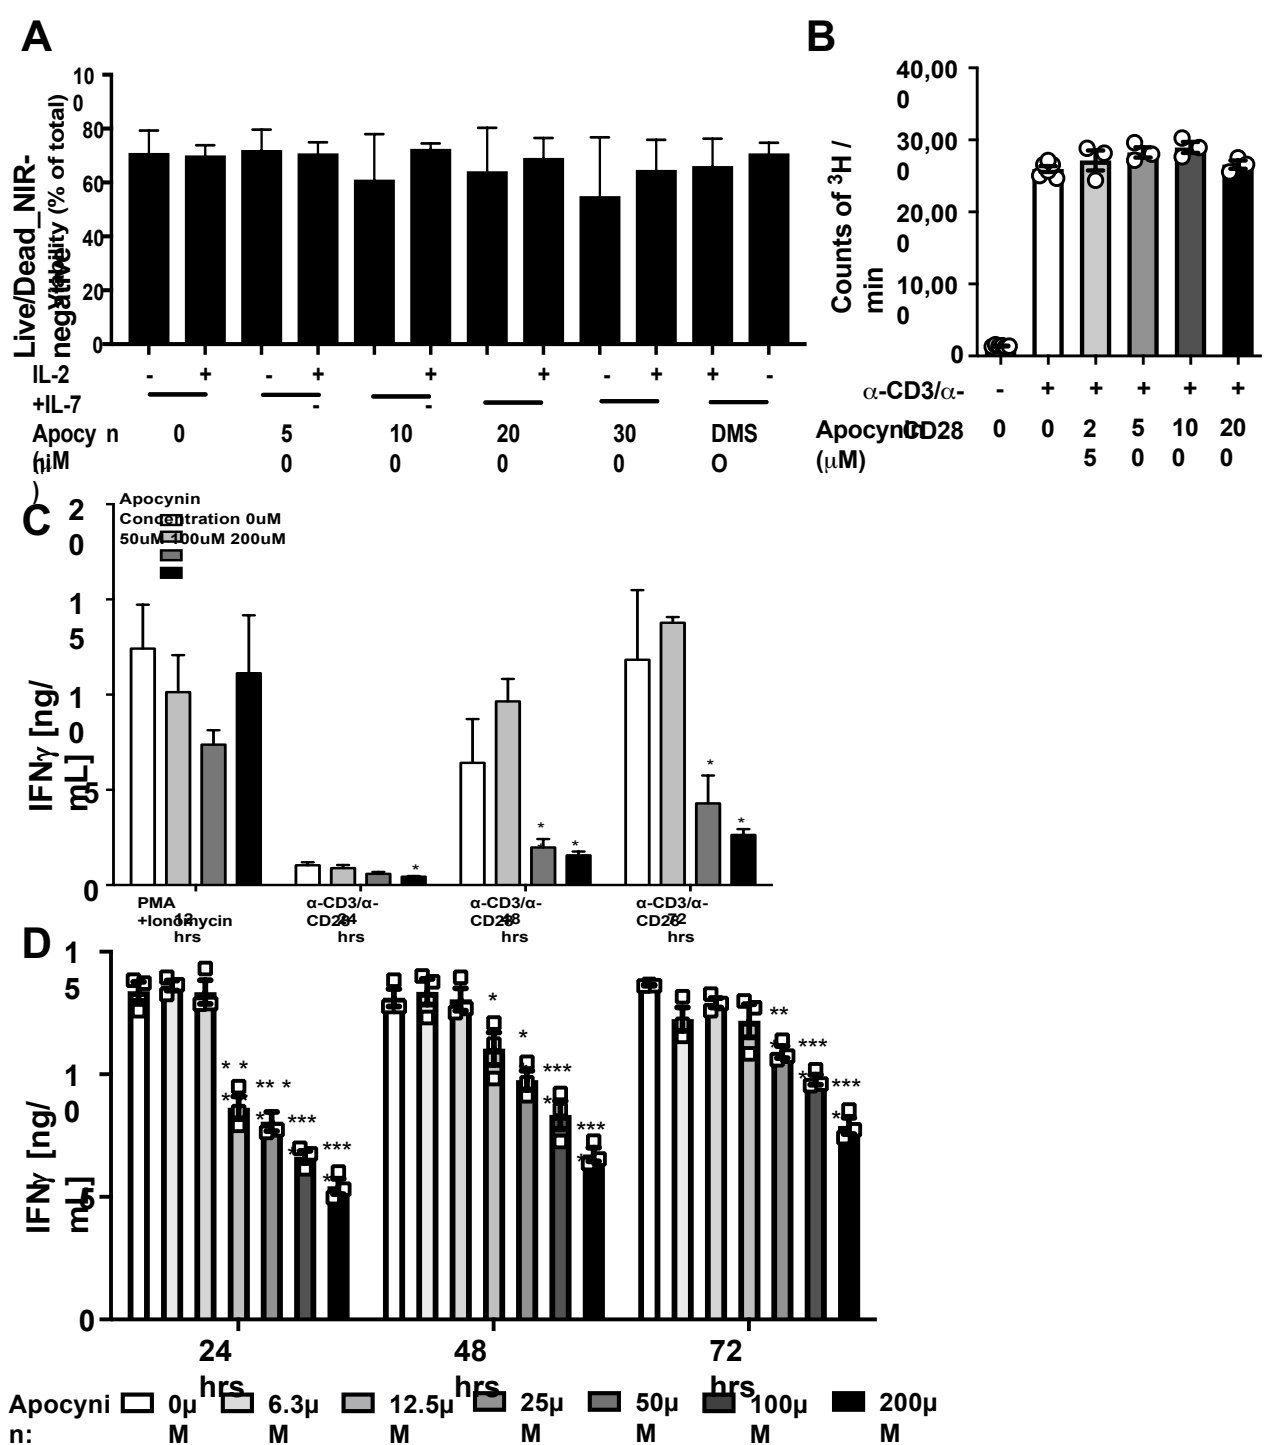

**Supplemental Figure 2. Dose Dependent Repression of IFN<sub>γ</sub> production by Apocynin in mouse and human CTL.** CD8<sup>+</sup> T cells from NOD mice were stimulated with α-CD3 and α-CD28 conjugated beads in the presence of the indicated concentrations of apocynin. (A) Viability was measured by flow cytometry using live-dead near infrared staining at 72 hrs. (B) Cell proliferation was measured using <sup>3</sup>H incorporation. (C) IFN<sub>γ</sub> was measured by ELISA in supernatants at the indicated times. (D) CD8<sup>+</sup> T cells from healthy volunteers were stimulated with α-CD3 and α-CD28 conjugated beads in the presence of the indicated concentrations of apocynin. IFN<sub>γ</sub> was measured by ELISA in supernatants at the indicated times. Statistical comparisons were made for the means of each dose versus the untreated group for the same time point. (\*  $P \leq 0.05$ ; \*\*  $P \leq 0.01$ ; \*\*\*  $P \leq 0.001$ ; \*\*\*\*  $P \leq 0.0001$ ).

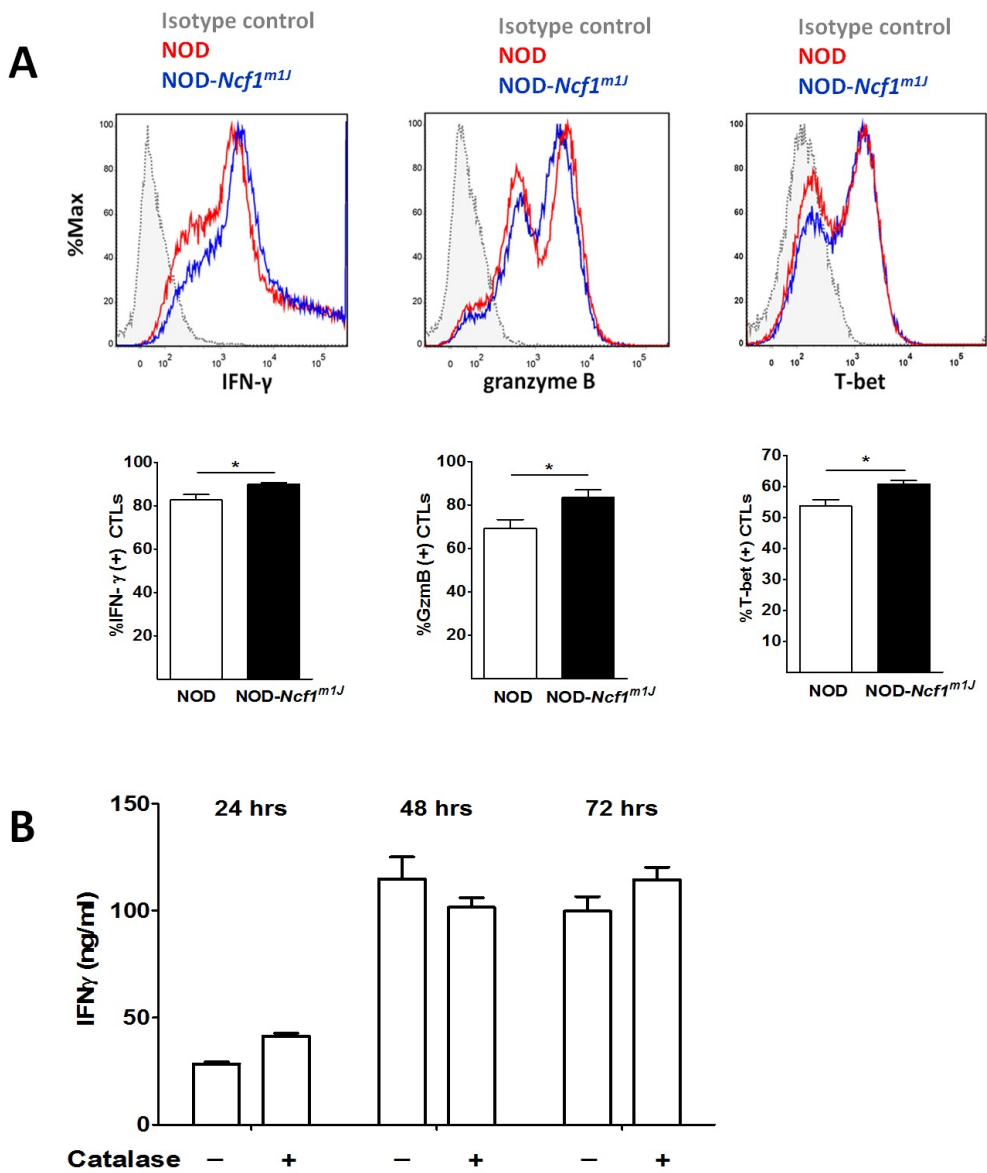

**Supplemental Figure 3. NOX2-derived ROS are not required for effector molecule production by CD8<sup>+</sup> T cells when activated by PMA and ionomycin.** (A) Histogram and the quantitation of intracellular staining in purified CD8<sup>+</sup> T cells ( $5 \times 10^5$  cells) after 50ng/mL PMA and 1 $\mu$ g/mL ionomycin stimulation for 48 hours with PMA/ionomycin plus Golgi stop added for the final 6 hours. At least four mice were included in each group. (B) NOD CD8<sup>+</sup> T cells were stimulated by PMA/ionomycin in the presence or absence of 1000U/mL catalase. After 24, 48, and 72hrs, supernatants were collected, and IFN $\gamma$  was measured by ELISA. Results are presented as the means ( $\pm$  SEM). Results are compared using Student's t test (\*  $P \leq 0.05$ ).
